# Supplementary material for: Glucose-based highly-porous activated carbon nanospheres (g-ACNSs) for high capacity hydrogen storage
Source: Royal Society of Chemistry journal article supplement (doi:10.1039/d4ya00126e), 2024-01-01
Supplement: d4ya00126e1.pdf [file d4ya00126e1.pdf]

## Electronic supplementary information

### Glucose-Based Highly-Porous Activated Carbon Nano Sphere (g-ACNS) for High Capacity Hydrogen Storage

Fan-Gang Tseng <sup>a,b,c,d</sup>, Dinesh Bhalothia <sup>a</sup>, Kuan-Hou Lo <sup>a</sup>, Cheng-Huei Syu <sup>a</sup>, Ying-Cheng Chen <sup>a</sup>, Amita Sihag <sup>a</sup>, Che-Wen Wang <sup>a</sup>, Hsin-Yi Tiffany Chen<sup>a,e\*</sup>, Tsan-Yao Chen<sup>a\*</sup>

<sup>a</sup>Department of Engineering and System Science, National Tsing Hua University, Hsinchu 300044, Taiwan

<sup>b</sup>Frontier Research Center on Fundamental and Applied Sciences of Matters

<sup>c</sup>Department of Chemistry, National Tsing Hua University, Hsinchu 300044, Taiwan

<sup>d</sup>Research Center for Applied Sciences, Academia Sinica, Taiwan

<sup>e</sup>College of Semiconductor Research, National Tsing Hua University, Hsinchu 300044, Taiwan

\*Corresponding Author(s):

Tsan-Yao Chen

Email: [chencaeser@gmail.com](mailto:chencaeser@gmail.com)

Tel: +886-3-5715131 # 34271

FAX: +885-3-5720724

Hsin-Yi Tiffany Chen

Email: [hsinyi.tiffany.chen@gapp.nthu.edu.tw](mailto:hsinyi.tiffany.chen@gapp.nthu.edu.tw)

## 1. Benchmark of carbon-based materials for H<sub>2</sub> storage application

**Table S1:** Hydrogen storage capacity for different carbon materials.

| Sample              | Hydrogen capacity | Surface Area      | Retention | Pressure | Temp. | Ref.      |
|---------------------|-------------------|-------------------|-----------|----------|-------|-----------|
|                     | wt%               | m <sup>2</sup> /g |           | MPa      | K     |           |
| Nano Fiber          | 0.4               | 150               |           | 4        | 77    | 19        |
| Graphene            | 0.34              | 20.5              |           | 10       | 77    | This work |
| A-NF                | 0.6               | 265               |           | 4        | 77    | 19        |
| XC72                | 1.39              | 215.6             |           | 10       | 77    | This work |
| SWNTs               | 2                 |                   |           | 10       | 80    | 20        |
| MWNT                | 5                 |                   |           | 10       | 300   | 38        |
| AX21                | 4.8               | 2513              |           | 4        | 77    | 19        |
| KUA6 <sup>[c]</sup> | 5.6               | 3808              |           | 4        | 77    | 19        |
| AC-K5               | 7.08              | 3190              |           | 2        | 77    | 21        |
| g-ACNS              | 5.04              | 2291-2555         | 100%      | 10       | 77    | This work |

[a]D band (1350 cm<sup>-1</sup>) and G band (1580 cm<sup>-1</sup>) Ratio, higher value ( $I_D/I_G$ ) represents more surface sp<sup>2</sup> structures

[b] High Surface Area and KOH Activated Carbon Made from Anthracite Coal

[c] Mixed Activated Carbon (abbreviated as AC, chemically pure, Shanghai Dahe Chemical Reagent Ltd.) and KOH for Calcination at 750°C under Argon atmosphere ( KOH: AC = 1:5 )

## 2. Raman analysis on the structural defects of CNs and reference samples

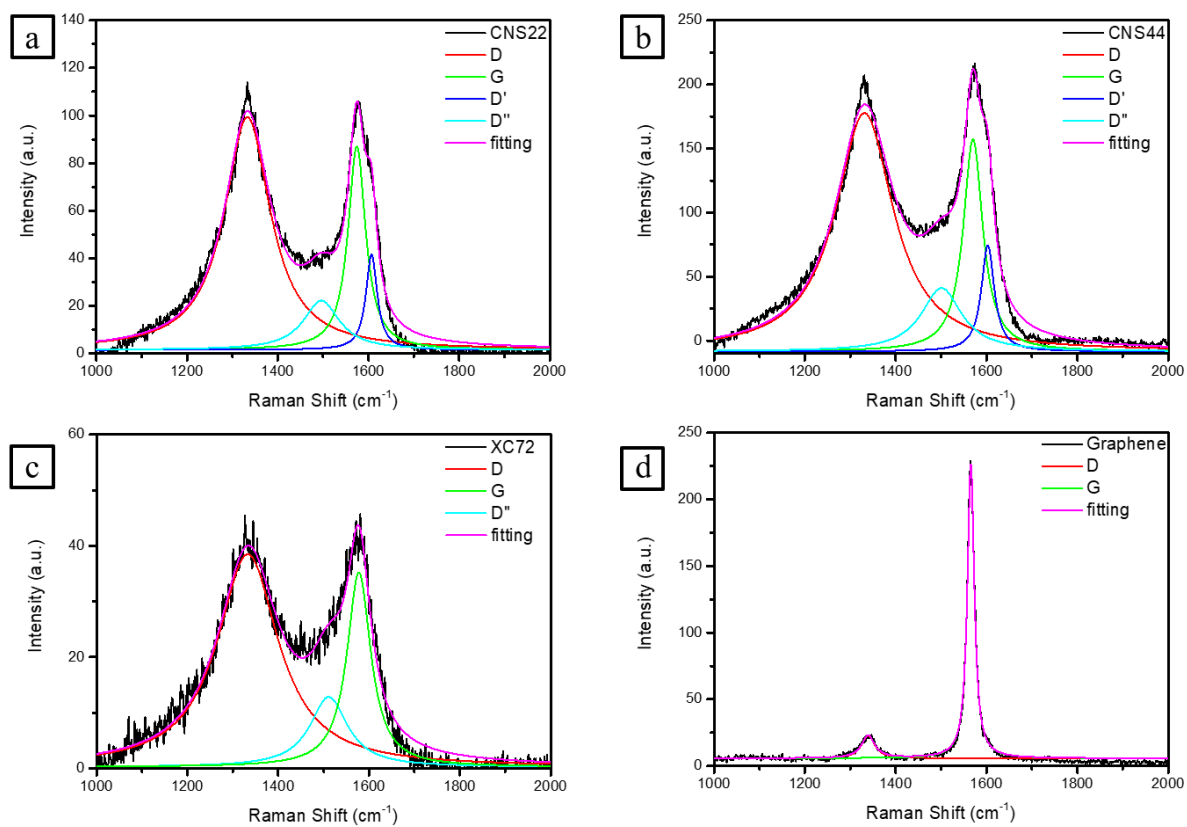

**Figure S1.** The fitting curves of Raman spectra for carbon nanosphere (CNS22 and CNS24), commercial active carbon (XC-72) and Graphene.
